# Supplementary material for: Mps1 kinase activity restrains anaphase during an unperturbed mitosis and targets Mad2 to kinetochores
Source: PubMed Central journal article supplement — J Cell Biol. 2008 Jun 16;181(6):893–901. doi: 10.1083/jcb.200712028 (PMC2426934; doi:10.1083/jcb.200712028), 2008-06-16
Supplement: jcb.200712028_4.pdf [file jcb.200712028_4.pdf]

Table S1. **PCR primers used in this study**

| Oligo | Sequence                                              | Purpose                                      |
|-------|-------------------------------------------------------|----------------------------------------------|
| 1     | 5'-CACGGATCCACCAAAGTGAGAGACATTAATAAG-3'               | Forward primer for amplification of Mps1 ORF |
| 2     | 5'-CACGCGGCCGCTCATTTTTTCCCCTTTTTTCAAAG-3'             | Reverse primer for amplification of Mps1 ORF |
| 3     | 5'-GAAGAAGCAGATAACCAGACCCTGGACAGCTATCGGAACGAAATAGC-3' | Forward mutagenic primer for RNAi resistance |
| 4     | 5'-GCTATTCGTTCCGATAGCTGTCCAGGGTCTGGTTATCTGCTTCTC-3'   | Reverse mutagenic primer for RNAi resistance |
| 5     | 5'-GGAATGCTAAAGCTAATTGCCTTTGGGATTGCAAACC-3'           | Forward mutagenic primer for D664A mutation  |
| 6     | 5'-GGTTTGCAATCCCAAAGGCAATTAGCTTTAGCATTCC-3'           | Reverse mutagenic primer for D664A mutation  |
| 7     | 5'-GTACATCTACATGGTAGCGGAGTGTGAAATATTG-3'              | Forward mutagenic primer for M602A mutation  |
| 8     | 5'-CAATATTCCACACTCCGCTACCATGTAGATGTAC-3'              | Reverse mutagenic primer for M602A mutation  |

Table S2. **shRNA sequences used in this study**

| Oligo | Sequence                    |
|-------|-----------------------------|
| A     | 5'-CCATCTTTTCATTCCCGAGC-3'  |
| B     | 5'-TACAGTCAAGCAATTGAAGCG-3' |
| C     | 5'-TCAAGAGCCAGATGATGCAC-3'  |
| D     | 5'-TTCTTCAAAAAGCTGTAGAAC-3' |
| E     | 5'-TTCAAATCACTGGCAGATTCC-3' |
| F     | 5'-CCAAACTCTTGATAGTTACCG-3' |

Table S3. **Antibodies used in this study**

| Antibody                                                  | Description            | Dilution | Source                                |
|-----------------------------------------------------------|------------------------|----------|---------------------------------------|
| SB1.3                                                     | Sheep anti-Bub1        | 1:1,000  | Taylor et al., 2001                   |
| SB3.2                                                     | Sheep anti-Bub3        | 1:1,000  | Unpublished data                      |
| SBR1.1                                                    | Sheep anti-BubR1       | 1:1,000  | Taylor et al., 2001                   |
| SMP1.1                                                    | Sheep anti-Mps1        | 1:1,000  | This study                            |
| SAB.1                                                     | Sheep anti-aurora B    | 1:1,000  | Girdler et al., 2006                  |
| SCF.1                                                     | Sheep anti-Cenp-F      | 1:800    | Hussein and Taylor, 2002              |
| SM2.2                                                     | Sheep anti-Mad2        | 1:500    | Johnson et al., 2004                  |
| 5F9                                                       | Mouse anti-BubR1       | 1:50     | Taylor et al., 2001                   |
| Cenp-E                                                    | Rabbit anti-Cenp-E     | 1:2,000  | Provided by D. Cleveland <sup>a</sup> |
| ACA                                                       | Human anticentromere   | 1:500    | Provided by B. Earnshaw <sup>b</sup>  |
| 9B10                                                      | Mouse anti-Mad1        | 1:500    | Abcam                                 |
| Cy2, Cy3, and Cy5<br>anti-sheep/-mouse/<br>-rabbit/-human | Conjugated secondaries | 1:500    | Jackson ImmunoResearch Laboratories   |

<sup>a</sup>University of California, San Diego, La Jolla, CA.<sup>b</sup>University of Edinburgh, Edinburgh, Scotland, UK.

## References

- Girdler, F., K.E. Gascoigne, P.A. Evers, S. Hartmuth, C. Crafter, K.M. Foote, N.J. Keen, and S.S. Taylor. 2006. Validating Aurora B as an anti-cancer drug target. *J Cell Sci.* 119:3664–3675.
- Hussein, D. and S.S. Taylor. 2002. Farnesylation of Cenp-F is required for G2/M progression and degradation after mitosis. *J. Cell Sci.* 115:3403–3414.
- Johnson, V.L., M.I. Scott, S.V. Holt, D. Hussein, and S.S. Taylor. 2004. Bub1 is required for kinetochore localization of BubR1, Cenp-E, Cenp-F and Mad2 and chromosomal congression. *J. Cell Sci.* 117:1577–1589.
- Taylor, S.S., D. Hussein, Y. Wang, S. Elderkin, and C.J. Morrow. 2001. Kinetochore localisation and phosphorylation of the mitotic checkpoint components Bub1 and BubR1 are differentially regulated by spindle events in human cells. *J. Cell Sci.* 114:4385–4395.
